# Supplementary material for: Self-Diffusion of Individual Adsorbed Water Molecules at Rutile (110) and Anatase (101) TiO2 Interfaces from Molecular Dynamics
Source: MDPI journal article supplement (doi:10.3390/cryst12030398), 2022-03-15
Supplement: s1 [file s1]

# Supplementary Information

## Self-Diffusion of Individual Adsorbed Water Molecules at Rutile (110) and Anatase (101) TiO<sub>2</sub> Interfaces from Molecular Dynamics

Stephanie J. Boyd <sup>1</sup>, Dáire O'Carroll <sup>1</sup>, Yogeshwaran Krishnan <sup>2</sup>, Run Long <sup>3</sup> and Niall J. English <sup>1,\*</sup>

<sup>1</sup> School of Chemical and Bioprocess Engineering, University College Dublin, D04 V1W8 Dublin, Ireland; stephanie.deoliveirajardim@ucdconnect.ie (S.J.B.); daire.ocarroll@ucdconnect.ie (D.O.)

<sup>2</sup> Department of Energy Conversion and Storage Atomic Scale Materials Modelling, DTU Orbit, Technical University of Denmark, 2800 Kongens Lyngby, Denmark; yogkr@dtu.dk

<sup>3</sup> Key Laboratory of Theoretical and Computational Photochemistry, Ministry of Education, College of Chemistry, Beijing Normal University, Beijing 100875, China; runlong@bnu.edu.cn

\* Correspondence: niall.english@ucd.ie

**Table S1.** Self-diffusivities [ $\times 10^{-9} \text{ m}^2 \text{ s}^{-1}$ ] (x,y,z) in adsorbed layer (IHL) and second layer (OHL) from each surface over the first 50 ps of 300 ps sub-intervals. Note that the sum of the different laboratory directions gives the total self-diffusivity. That of bulk water is  $\sim 2.23 \times 10^{-9} \text{ m}^2 \text{ s}^{-1}$  whilst the experimental bulk-water value is  $2.3 \times 10^{-9} \text{ m}^2 \text{ s}^{-1}$ .

**Table S2.** Self-diffusion D ( $\text{m}^2/\text{s}$ ) for anatase (101) and rutile (110) at different 50 ps sub-intervals from 100 to 300 ps.

**Figure S1.** Average hydrogen bonds of different adsorbed layers.

**Figure S2.** Probability distribution of self-diffusion coefficients of each individual water molecule in the OHL averaged over a 50 ps sub-interval (450 to 500 ps) for (a) rutile. (b) anatase Diffusivities of the x, y, z directions are shown in blue, red and green dashed lines, respectively. The total diffusivity of individual molecules is represented by the solid black line. Although this sub-interval showed rather unexpected results in the OHL, the other intervals presented distributions similar to those in the 300 ps sub-intervals.

**Figure S3.** Mean square displacement (MSD) of water molecules in different layers at the water-TiO<sub>2</sub> (a) anatase (101) and (b) rutile (110) interface for the interval of 350 and 400 ps. The self-diffusivity experimental bulk-water value of  $2.3 \times 10^{-9} \text{ m}^2 \text{ s}^{-1}$  is represented by the grey dotted line for reference.

**Figure S4.** Velocity auto-correlation function of adsorbed layers of rutile (110).

**Figure S5.** Probability distribution of self-diffusion coefficients of each individual water molecule averaged over 50 ps sub-intervals for rutile (110) IHL. Water molecules are considerably sluggish in the IHL for all 50 ps sub-intervals

**Figure S6.** Dissociative adsorption of water on (a) anatase (101) and (b) rutile (110) surface considering full monolayer coverage. The water molecule on left-side panels consequently split to OH<sup>-</sup> that adsorbs on Ti<sub>5c</sub> and H<sup>+</sup> adsorbing on O<sub>2c</sub>/O<sub>b</sub> (right-side panels). Titanium atoms are shown in light blue, water hydrogen in white, and oxygen atoms from both TiO<sub>2</sub> and water in red. The dashed blue lines represent hydrogen bonds.

**Table S1.** Self-diffusivities [ $\times 10^{-9} \text{ m}^2 \text{ s}^{-1}$ ] (x,y,z) in adsorbed layer (IHL) and second layer (OHL) from each surface over the first 50 ps of 300 ps sub-intervals. Note that the sum of the different laboratory directions gives the total self-diffusivity. That of bulk water is  $\sim 2.23 \times 10^{-9} \text{ m}^2 \text{ s}^{-1}$  whilst the experimental bulk-water value is  $2.3 \times 10^{-9} \text{ m}^2 \text{ s}^{-1}$ .

| Surface       | IHL                    | OHL                 |
|---------------|------------------------|---------------------|
| Rutile (110)  | 0.0360, 0.0334, 0.0158 | 1.092, 0.904, 0.935 |
| Anatase (101) | 0.398, 0.361, 0.184    | 0.497, 0.374, 0.323 |

**Table S2.** Self-diffusion D ( $\text{m}^2/\text{s}$ ) for anatase (101) and rutile (110) at different 50 ps sub-intervals from 100 to 300 ps.

| Surface     | 100 ps                 | 150 ps                 | 200 ps                 | 250 ps                 | 300 ps                 |
|-------------|------------------------|------------------------|------------------------|------------------------|------------------------|
| Anatase IHL | $5.33 \times 10^{-10}$ | $3.34 \times 10^{-10}$ | $4.94 \times 10^{-10}$ | $5.85 \times 10^{-10}$ | $4.41 \times 10^{-10}$ |
| Rutile IHL  | $1.86 \times 10^{-11}$ | $1.69 \times 10^{-11}$ | $1.38 \times 10^{-11}$ | $1.39 \times 10^{-11}$ | $1.36 \times 10^{-11}$ |
| Anatase OHL | $1.83 \times 10^{-9}$  | $1.54 \times 10^{-9}$  | $1.47 \times 10^{-9}$  | $1.48 \times 10^{-9}$  | $1.94 \times 10^{-9}$  |
| Rutile OHL  | $2.25 \times 10^{-9}$  | $6.52 \times 10^{-10}$ | $7.83 \times 10^{-10}$ | $3.03 \times 10^{-9}$  | $9.78 \times 10^{-10}$ |

### Hydrogen Bond Distribution

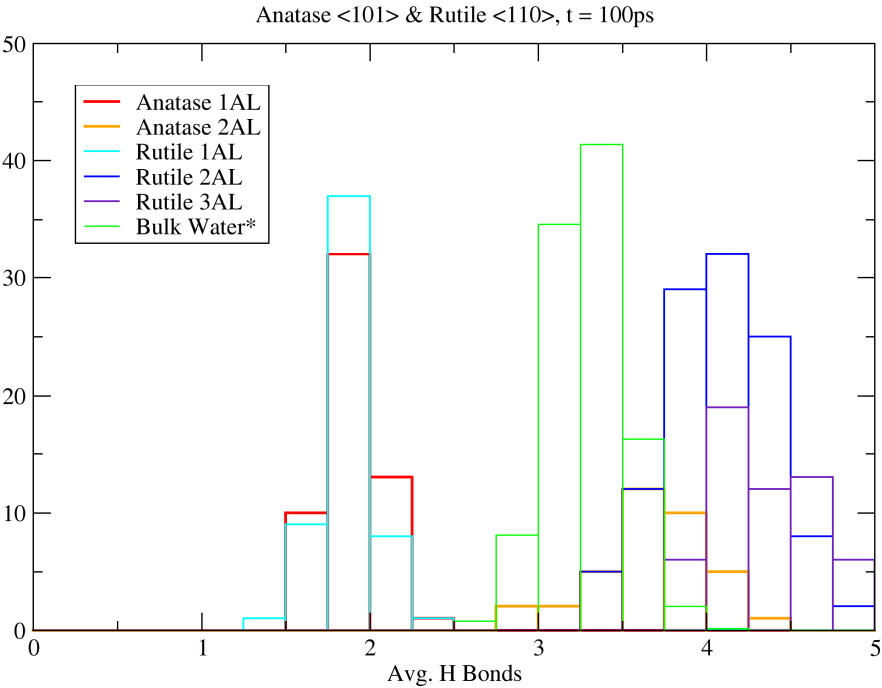

\* Bulk water run for 5 ps and normalised.

**Figure S1.** Average hydrogen bonds of different adsorbed layers.

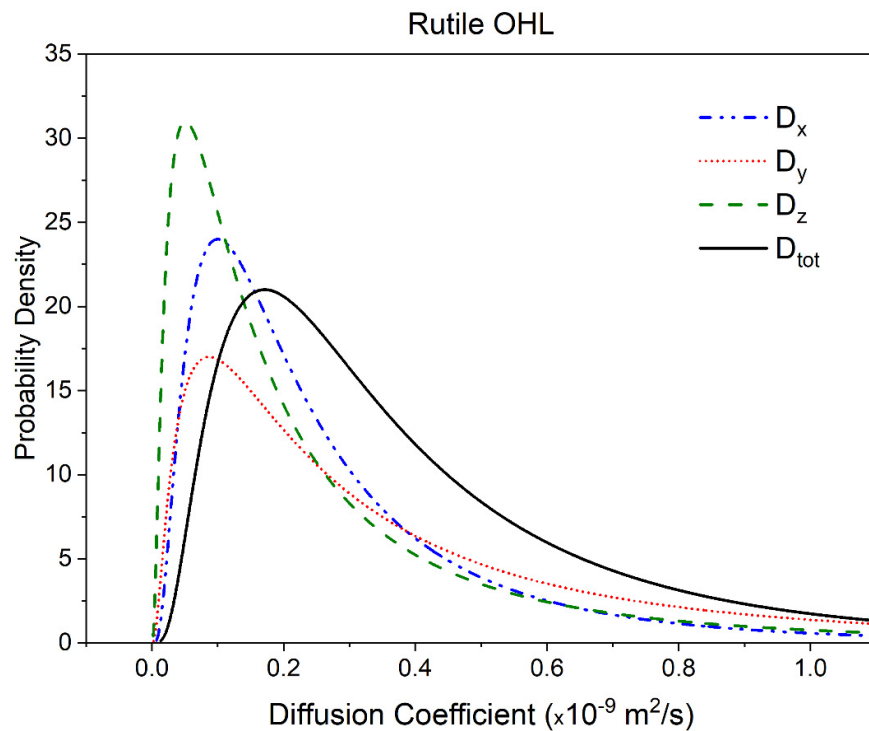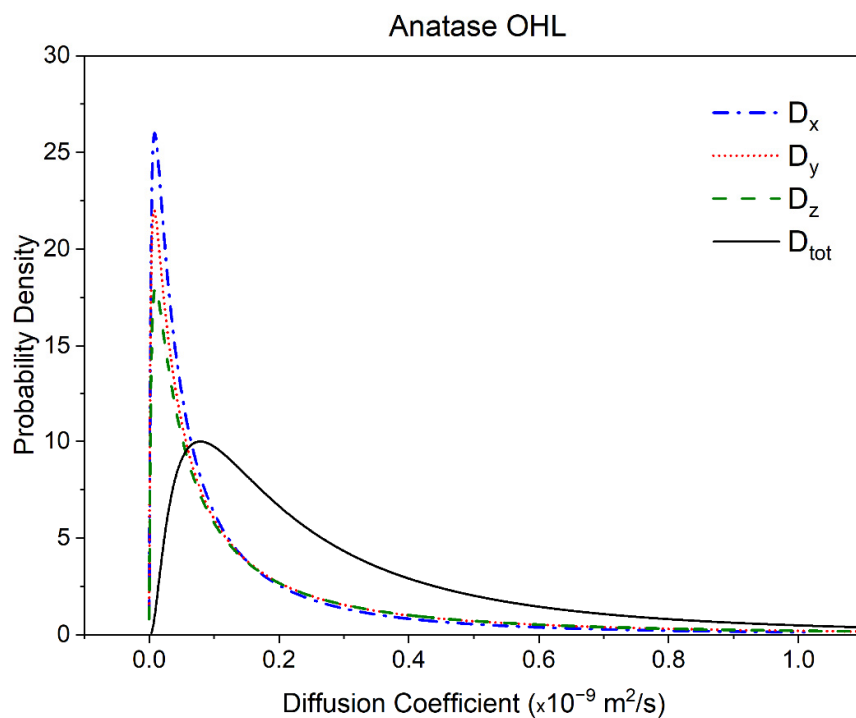

**Figure S2.** Probability distribution of self-diffusion coefficients of each individual water molecule in the OHL averaged over a 50 ps sub-interval (450 to 500 ps) for (a) rutile. (b) anatase Diffusivities of the x, y, z directions are shown in blue, red and green dashed lines, respectively. The total diffusivity of individual molecules is represented by the solid black line. Although this sub-interval showed rather unexpected results in the OHL, the other intervals presented distributions similar to those in the 300 ps sub-intervals.

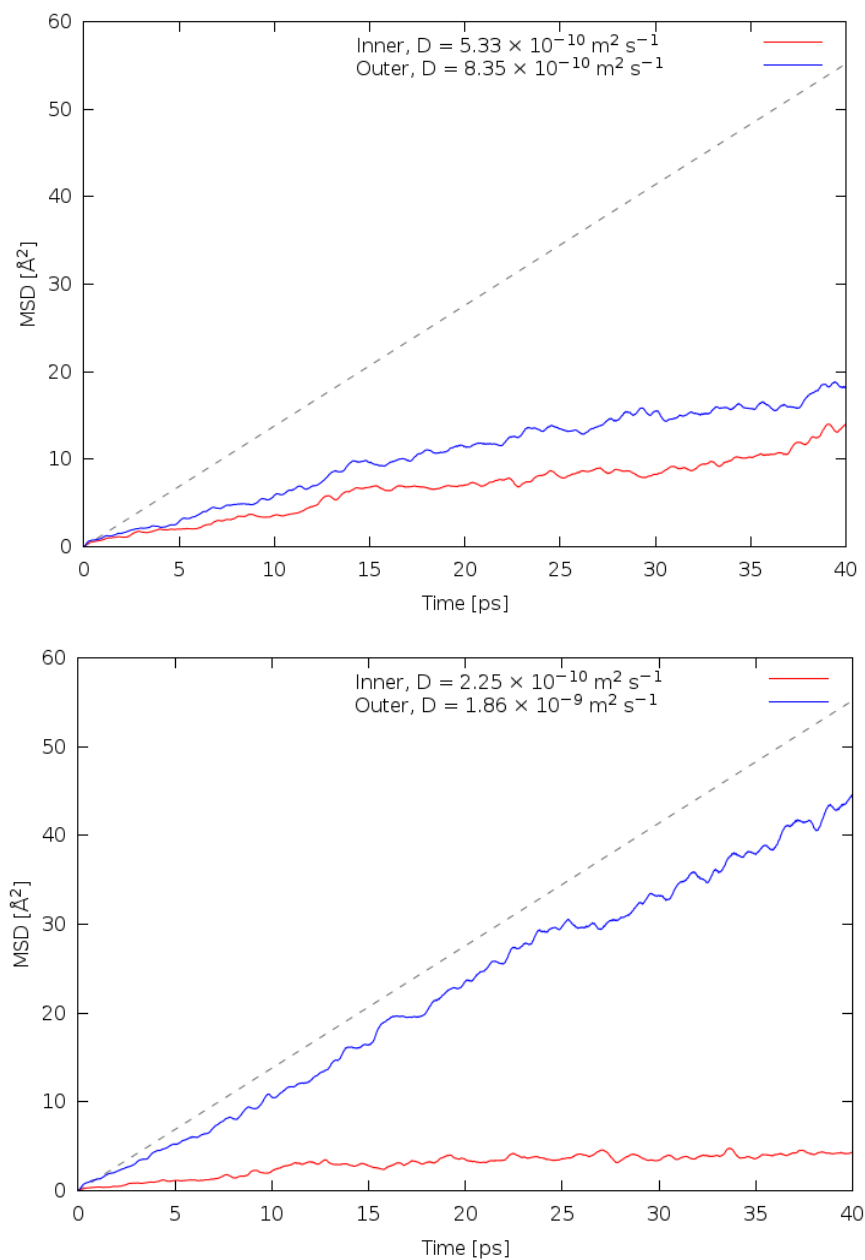

**Figure S3.** Mean square displacement (MSD) of water molecules in different layers at the water-TiO<sub>2</sub> (a) anatase (101) and (b) rutile (110) interface for the interval of 350 and 400 ps. The self-diffusivity experimental bulk-water value of  $2.3 \times 10^{-9} \text{ m}^2 \text{ s}^{-1}$  is represented by the grey dotted line for reference.

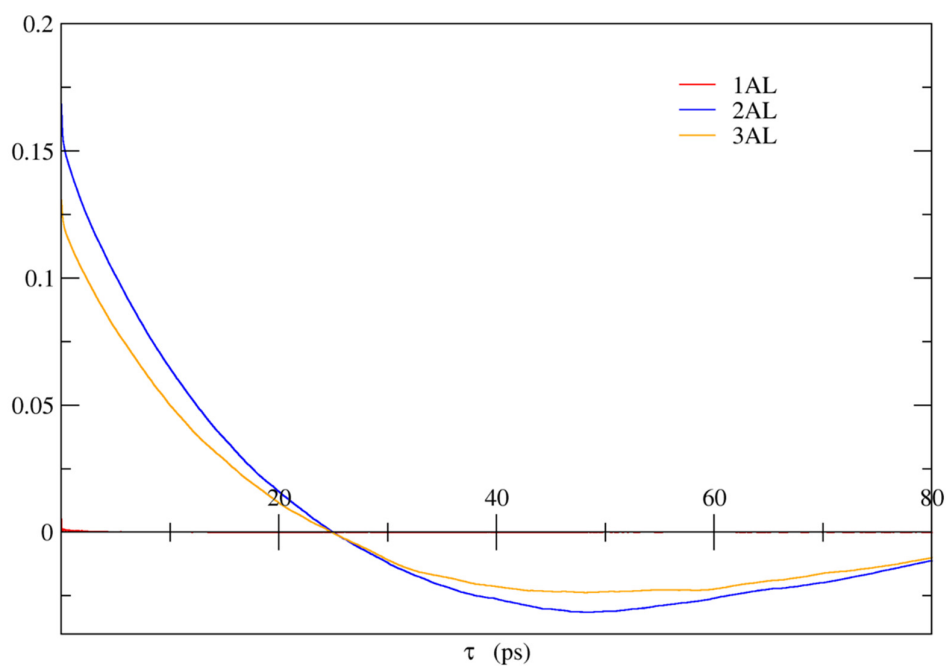

**Figure S4.** Velocity auto-correlation function of adsorbed layers of rutile (110).

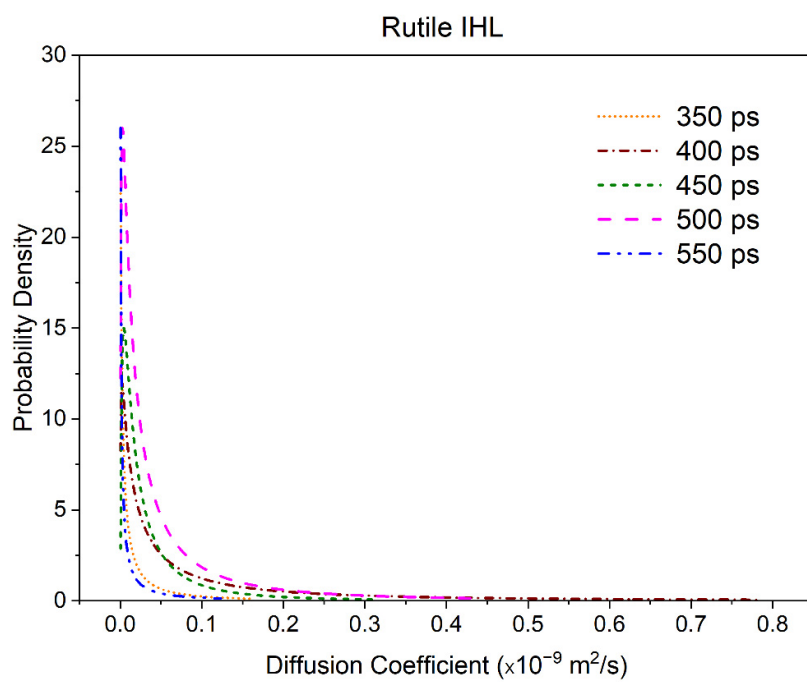

**Figure S5.** Probability distribution of self-diffusion coefficients of each individual water molecule averaged over 50 ps sub-intervals for rutile (110) IHL. Water molecules are considerably sluggish in the IHL for all 50 ps sub-intervals

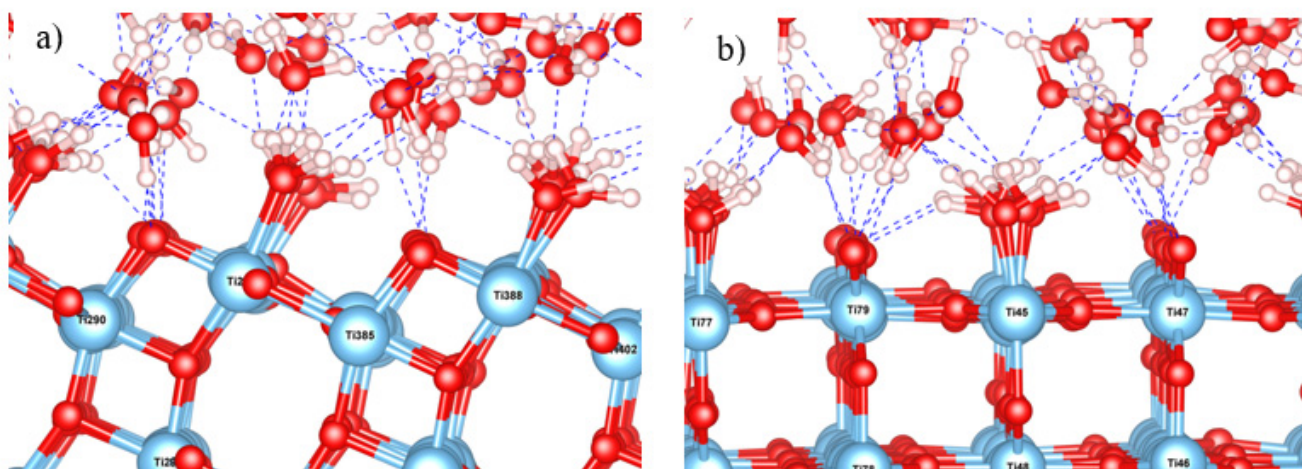

**Figure S6.** Dissociative adsorption of water on (a) anatase (101) and (b) rutile (110) surface considering full monolayer coverage. The water molecule on left-side panels consequently split to  $\text{OH}^-$  that adsorbs on  $\text{Ti}_{5c}$  and  $\text{H}^+$  adsorbing on  $\text{O}_{2c}/\text{O}_b$  (right-side panels). Titanium atoms are shown in light blue, water hydrogen in white, and oxygen atoms from both  $\text{TiO}_2$  and water in red. The dashed blue lines represent hydrogen bonds.
